1 **Structural inventory of cotranslational protein folding**  
2 **by the eukaryotic RAC complex**

3

4 Miglè Kišonaitė<sup>1</sup>, Klemens Wild<sup>1</sup>, Karine Lapouge<sup>1</sup>, Genís Valentín Gesé<sup>1</sup>, Nikola  
5 Kellner<sup>1</sup>, Ed Hurt<sup>1</sup> and Irmgard Sinning<sup>1,\*</sup>

6

7 <sup>1</sup>Biochemiezentrum der Universität Heidelberg (BZH), INF 328, D-69120 Heidelberg,  
8 Germany

9

10

11

12

13

14

15

16

17 **\*Correspondence:**

18 **Prof. Dr. Irmgard Sinning**

19 **Biochemiezentrum der Universität Heidelberg (BZH)**

20 **Im Neuenheimer Feld 328**

21 **D-69120 Heidelberg, Germany**

22 **Email: [irmi.sinning@bzh.uni-heidelberg.de](mailto:irmi.sinning@bzh.uni-heidelberg.de)**

23 **Phone: +49 6221 544781**

24 **FAX: +49 6221 544790**

25 **Abstract**

26 **Folding of nascent chains emerging from the ribosome is a challenge in cellular**  
27 **protein homeostasis, which in eukaryotes is met by an Hsp70 chaperone triad**  
28 **directly binding at the ribosomal tunnel exit. The conserved ribosome-**  
29 **associated complex (RAC) consists of the non-canonical Hsp70 Ssz1 and the J-**  
30 **domain protein Zuotin (Zuo1), which in fungi acts together with the canonical**  
31 **Hsp70 protein Ssb. Here, we determined high-resolution cryo-electron**  
32 **microscopy structures of RAC bound to the 80S ribosome. RAC adopts two**  
33 **distinct conformations accommodating continuous ribosomal rotation by a**  
34 **flexible lever arm. The heterodimer is held together by a tight interaction**  
35 **between the Ssz1 substrate-binding domain (SBD) and the N-terminus of Zuo1,**  
36 **with additional contacts between the Ssz1 nucleotide-binding domain (NBD)**  
37 **and the Zuo1 J- and ZHD domains that form a rigid unit. The Zuo1 HPD-motif**  
38 **conserved in J-proteins is masked by the Ssz1 NBD, different from the canonical**  
39 **Hsp70 J-protein contact, however, allowing to position Ssb for activation by**  
40 **Zuo1. Our data provide the basis for understanding how RAC cooperates with**  
41 **Ssb at the ribosome in dynamic nascent chain interaction and protein folding.**

42

## 43 Introduction

44 Efficient protein folding is a challenge for proteostasis in all organisms, which already  
45 during translation is ensured by ribosome-associated chaperones that modulate  
46 protein synthesis and are among the first contacts of the emerging polypeptides<sup>1,2</sup>.  
47 RAC is conserved in eukaryotes, and in *S. cerevisiae* comprises a stable heterodimer  
48 formed by the non-canonical Hsp70 homolog Ssz1 and the J-domain protein (JDP)  
49 Zuo1<sup>3,4</sup>. Ssz1 differs from canonical Hsp70s in several ways: it binds ATP but does  
50 not hydrolyze, and ATP binding is not required for its function<sup>5</sup>; it has a unique domain  
51 arrangement and a truncated substrate binding domain (SBD) with only a rudimentary  
52  $\beta$ -sandwich domain (SBD $\beta$ ); it lacks the  $\alpha$ -helical lid domain (SBD $\alpha$ ) and the  
53 conserved linker<sup>3,6</sup>, which is central to the allosteric regulation of canonical Hsp70  
54 activity<sup>7</sup>. Instead, the linker in Ssz1 is extended and adopts an  $\alpha\beta$ -structure that  
55 intertwines with the Zuo1 N-terminus, which complements SBD $\beta$  and moulds this  
56 unusual Hsp70/JDP pair into a stable, functional unit<sup>6,8</sup> (**Fig. 1a**). Zuo1 is a class C  
57 JDP and the only Hsp40 that activates the ribosome-associated Hsp70 protein Ssb  
58 (encoded by two isoforms *SSB1* and *SSB2*, that are nearly identical)<sup>3,9</sup>. In general,  
59 JDPs play a central role in specifying and directing Hsp70 functions<sup>10-12</sup>. They  
60 comprise a universally conserved HPD-motif, which is essential for stimulating the  
61 ATPase activity in all JDP/Hsp70 pairs<sup>13</sup>. However, the co-chaperone function of Zuo1  
62 requires the presence of Ssz1<sup>4</sup>, underlining that RAC and Ssb form a functional  
63 chaperone triad at the ribosome<sup>14,15</sup>. Nascent chain (NC) binding by Ssb requires the  
64 presence of RAC<sup>16</sup> and accelerates translation<sup>17</sup>. Both RAC proteins contact the NCs  
65 and form a relay system that transfers polypeptides from Zuo1 via Ssz1 to Ssb<sup>8</sup>. The  
66 majority of nascent proteins interact with Ssb by multiple binding-release cycles<sup>18</sup>.  
67 RAC binding to the ribosome has been thoroughly studied by cross-linking

68 experiments and low-resolution cryo-EM structures showing flexible conformations on  
69 idle 80S ribosomes and interactions with both the 40S and 60S subunits<sup>5,19-24</sup>.  
70 However, the integration of Ssb, its ATPase cycle, NC and ribosome interactions into  
71 the workings of RAC has remained incomplete. A recent *in vivo* cross-linking study  
72 suggests a pathway of Ssb movement at the ribosome and places Ssb next to the  
73 Ssz1 NBD<sup>24</sup>. However, all these data did not provide a complete picture of the  
74 RAC/Ssb triad at the ribosome.

75

## 76 **Results**

77 We now determined high-resolution structures of RAC bound to translating 80S  
78 ribosomes using native *Chaetomium thermophilum* (*C. thermophilum*, Ct)  
79 complexes<sup>25</sup> pulled-out on Ssz1 for subsequent cryo-EM structure determination at  
80 3.2 and 3.3 Å resolution (**Fig. 1, Extended Data Figure 1 and Extended Data Table**  
81 **1**). We obtained multiple 80S-RAC structures (with different ribosomal rotation states  
82 and RAC conformations) including mixtures of nascent chains visible from the  
83 peptidyl-transferase center (PTC) to the very tunnel exit, and with extra-ribosomal  
84 factor RACK1 and the protective factor Stm1 bound as recently described for Ct80S  
85 ribosomes<sup>26</sup>. The quality of the cryo-EM map representing RAC allowed us to build a  
86 complete model of this multidomain complex (**Fig. 1a**). Our recent X-ray-structures of  
87 the RAC core comprising Ssz1 with its SBD completed by the Zuo1 N-terminus, could  
88 be readily placed as rigid-bodies<sup>6,8</sup>. Although for Zuo1-ZHD (Zuotin homology domain)  
89 and the C-terminal four helix-bundle (4HB) structural models were available<sup>20,22,27</sup>,  
90 large parts of Zuo1 including the J-domain, the MD and linkers between domains had  
91 to be built *de novo* (**Fig. 1b, c and Extended Data Fig. 2**).

92

### 93 **Complete RAC reveals contacts between Ssz1-NBD and Zuo1 J-ZHD**

94 In our RAC structures, Zuo1 contacts the Ssz1-SBD mainly by the previously  
95 described tight interaction with Zuo1N (residues 1 to 72; 3060 Å<sup>2</sup> interface area with a  
96 ΔG of -42.4 kcal/mol, 80% of the total Ssz1-Zuo1 interface)<sup>6,8</sup>. A conserved polyproline  
97 type-II helix (LP-motif) at the Zuo1 N-terminus binds to the Ssz1-SBD as a pseudo-  
98 substrate<sup>6,8</sup>. The Ssz1-Zuo1N interface is now enlarged by an extension of Zuo1N-αI  
99 and an additional α-helix (Zuo1N-αII, residues 62 to 72; **Fig. 1** and **Extended Data**  
100 **Fig. 2**) that grab the Ssz1 specific linker helix (αL) connecting NBD and SBD. A linker  
101 between Zuo1N and the J-domain (residues 73 to 87) is highly negatively charged and  
102 barely contacts the Ssz1-SBD and Zuo1 J-domain (residues 88 to 175). The J-domain  
103 shows the canonical fold of JDPs with a central helical hairpin<sup>28</sup> that forms the only  
104 contact between the J-domain and Ssz1-NBD (685 Å<sup>2</sup>, ΔG of -2.7 kcal/mol). This  
105 hairpin bridges lobe IIA to IIB and contains the conserved HPD-motif (*CtZuo1* His133-  
106 Pro134-Asp135), which is crucial for Hsp70 activation<sup>28</sup>. The HPD-motif breaks the  
107 first helix at its C-terminus and is completely masked by its Ssz1-NBD interaction  
108 (**Extended Data Fig. 3a**; see below). This contact differs from the classical  
109 Hsp70/JDP activating complex<sup>29</sup>, where the HPD-motif interacts with the conserved  
110 Hsp70 linker region, inserts the helical hairpin between NBD lobes IA and IB, and  
111 contacts also SBDβ (**Extended Data Fig. 3b**). Of note, this canonical contact is also  
112 small and unstable (925 Å<sup>2</sup>, ΔG of -1.3 kcal/mol), which is reflected by a generally  
113 transient Hsp70/JDP interaction<sup>7</sup>. However, in both cases the contact involves mostly  
114 polar or ionic residues, and is centred around the HPD-motif (and a following positive  
115 residue) with the aspartate forming a salt bridge.

116 In contrast to the Zuo1 N-J connection, the Zuo1-ZHD (residues 176 to 289) is  
117 directly linked to the J-domain, which together form a rigid entity (**Fig. 1a-c**). The ZHD

118 closely corresponds to an X-ray structure for yeast Zuo1-ZHD (root mean squared  
119 deviation of 2.0 Å)<sup>22</sup> and comprises a three-helix bundle with an extended C-terminal  
120  $\alpha$ -helix (ZHD- $\alpha$ III). The ZHD was previously characterized as ribosome-binding  
121 domain<sup>22</sup>, but its interactions within RAC were not resolved. Our structures reveal an  
122 intimate contact with Zuo1-J, mostly to J- $\alpha$ III flanked by loop interactions involving salt  
123 bridges and stacking of aromatic residues (buried surface area 623 Å<sup>2</sup>,  $\Delta$ G of -5,2  
124 kcal/mol). We also observe an additional small contact between Zuo1-ZHD and Ssz1-  
125 NBD, which involves two aspartates adjacent to ZHD- $\alpha$ III (**Fig. 1c**). This contact  
126 changes between the two distinct conformations of RAC on the 80S ribosome (see  
127 below). Between the ZHD and the following helical middle domain (MD, residues 290  
128 to 354) a tight  $\pi$ -cation stacking network is observed fixing the first two turns of MD- $\alpha$ I  
129 to the ZHD (**Fig. 1c**). The MD connects the three N-terminal Zuo1 domains to the rigid  
130 C-terminal four-helix bundle (4HB; residues 355 to 446), which anchors RAC on the  
131 40S subunit by interacting with the rRNA expansion segment ES12. Taken together,  
132 our data allow to build a complete model of RAC with precisely defined domain  
133 boundaries and to describe interactions within Zuo1 as well as with Ssz1, which are  
134 different from canonical Hsp70/JDP interactions.

135

## 136 **Two distinct conformations of RAC on the 80S ribosome**

137 Consistent with previous data<sup>3,6,20,21</sup>, our RAC-80S complexes display an extended  
138 RAC structure that spans more than 200 Å and contacts both ribosomal subunits. RAC  
139 adopts two distinct conformations (denoted RAC-1 and RAC-2) on a rotating ribosome  
140 (**Fig. 2, main panels** and **Extended Data Fig. 4**). This ratchet-like motion is a  
141 conserved feature of all ribosomes and is intrinsic to mRNA/tRNA translocation<sup>30</sup>. 3D  
142 variability analysis<sup>31</sup> allowed us to visualize continuous movement of the 40S subunit

143 in respect to 60S for both RAC conformations (**Extended Data Fig. 5a** and **Extended**  
144 **Data Movie 1**). It was previously thought that RAC stabilizes the 80S ribosome in the  
145 non-rotated state and that its movement is coupled to ribosomal rotation<sup>21</sup>. However,  
146 our structures demonstrate that idle 80S ribosomes containing RAC in either  
147 conformation exhibit the same distribution of rotational states (**Extended Data Fig.**  
148 **5b**). The rotation of the entire 40S body, except the ES12 movements, in both cases  
149 reaches to about 7° and the swiveling of the 40S head reaches up to 18°. For better  
150 comparison, RAC-1 and RAC-2 were built on the non-rotated ribosome.

151 In both RAC conformations, interactions with the ribosome are exclusively formed  
152 through Zuo1 by a lever arm (residues 253 to 371) that we define based on our  
153 structures to include ZHD- $\alpha$ III (residues 253 to 289), the entire MD (residues 290 to  
154 354), and 4HB- $\alpha$ I (residues 355 to 371). Ssz1 does not interact with the ribosome, but  
155 is kept in close proximity to the ribosomal tunnel exit by its interaction with Zuo1N<sup>6,8</sup>  
156 and by the two small contacts between Ssz1-NBD with the Zuo1 J-ZHD unit.

157 While a previous study suggested that the RAC-ribosome interaction changes with  
158 ribosomal rotation<sup>21</sup>, our data clearly show that the Zuo1 lever arm anchors RAC at  
159 the ribosome with two main contacts (C1 and C2) that are maintained in both RAC  
160 conformations independent of the ribosomal rotation state. C1 is formed by the N-  
161 terminal end of the lever arm at the rim of the ribosomal tunnel exit (**Fig. 2a, d**) with  
162 three conserved arginines from ZHD- $\alpha$ III (Arg253, 257, and 261; for homology see  
163 **Extended Data Fig. 2**). These arginines form a so-called ARM (arginine-rich motif)<sup>32</sup>  
164 that affixes Zuo1 in the major groove of the tetranucleotide loop (tetraloop, 376-GAAA)  
165 at the tip of helix H24 of 26S rRNA. The interaction is completed by the positive N-  
166 terminal helix dipole of ZHD- $\alpha$ III, which positions the helix on the phosphoribose  
167 backbone. In yeast, the corresponding arginines 247 and 251 also contact H24 of the

168 26S rRNA<sup>22</sup>, and disruption of this contact completely abolishes RAC binding to the  
169 ribosome in yeast, both *in vitro* and *in vivo*<sup>33</sup>.

170 C2 is formed at the C-terminal end of the lever arm between Zuo1-4HB and the  
171 closing tetraloop (1695-GCAA) of 18S rRNA ES12 in the 40S subunit (**Fig. 2c, f**).  
172 Similar to C1, C2 also involves an elaborate ARM interaction between 4HB- $\alpha$ I and  
173 ES12. The helix contributes two arginines (Arg362, 365) and five lysines (Lys350, 354,  
174 358, 359, and 369) to this interaction. While ES12 shortening severely affected  
175 translation fidelity and readthrough effects of stop codons, the RAC-ribosome  
176 interaction was only mildly destabilized<sup>22</sup>.

177 The C1 and C2 contacts appear invariant in both RAC conformations. However,  
178 the lever arm undergoes a complex motion, which can be described by a bending  
179 elbow located in the MD (here denoted as MD-elbow at Lys305; **Extended Data Fig.**  
180 **6a**). While in RAC-1 the MD-elbow is bent by 37°, it is straightened up in RAC-2 (**Fig.**  
181 **2**, main panels). In addition, two minor hinges (<20°) localize at both ends of the lever  
182 arm, between ZHD and MD (ZHD-hinge at Glu290) and between MD and 4HB (4HB-  
183 hinge at Asn355) (**Extended Data Fig. 6b, c**). Interestingly, when RAC-1 and RAC-2  
184 are superposed on Ssz1 (**Extended Data Fig. 6**), Ssz1 and Zuo1 J-ZHD (as well as  
185 the 4HB by itself) overall behave as rigid bodies (root mean squared deviations <1.3  
186 Å). However, as both ends of Zuo1 are fixed on the ribosome, the invariant C1 and C2  
187 contacts must somehow accommodate changes within the MD-elbow. Indeed, when  
188 comparing the RAC-1 and RAC-2 contacts with the ribosome, the Zuo1-ZHD rotates  
189 around C1 (residues 246-261) in respect to the J-ZHD unit (45° rotation at borders)  
190 (**Extended Data Fig. 6d**), while C2 is maintained by a significant bending of ES12  
191 (**Fig. 2**, main panels; and see below).



192        Apart from C1 and C2, there are several interactions between the lever arm and  
193 the ribosome that are adjusted. In RAC-1, Zuo1-ZHD interacts with protein eL31 via a  
194 mixed polar-apolar helical bundle (ZHD- $\alpha$ II and eL31 N-terminal helix) and multiple  
195 salt bridges between the lever arm (ZHD- $\alpha$ III) and an internal eL31 loop (**Fig. 2b**). This  
196 interaction nicely correlates with previously observed cross-link data<sup>22</sup>. Interestingly,  
197 the eL31 N-terminal helix is rotated by 50° towards the ZHD compared to RAC-2 (and  
198 the idle 80S ribosome<sup>26</sup>) (**Extended Data Fig. 6e**). Furthermore, the MD-elbow rests  
199 on the 26S rRNA 3'-end (H101) with Arg310 seemingly stacking on a bulged-out  
200 cytosine (C3324) (**Extended Data Fig. 7a**).

201        In RAC-2, these interactions have disappeared (**Extended Data Fig. 7c, d**) and  
202 straightening the MD-elbow moved the lever arm by up to 40 Å on top of protein eL22,  
203 which fixes the ZHD-hinge by two internal loops and its very C-terminus (**Fig. 2e**). In  
204 particular, Zuo1 Arg296 is involved in  $\pi$ -cation stacking with a tryptophan and in a salt  
205 bridge. Previous cross-linking studies failed to detect the eL22 contact, probably due  
206 to technical reasons<sup>22</sup>. Finally, adjacent to C1 a weak contact between H47 and a  
207 single lysine (Lys268) is observed, which is lost in RAC-1 (**Fig. 2a, d**). Another striking  
208 difference is observed next to the tunnel exit at the contact between Zuo1-ZHD and  
209 Ssz1-NBD (**Fig. 3a, b**). In RAC-1, this contact comprises two salt-bridges (Zuo1-  
210 Asp248/Ssz1-Lys255, Asp249/Lys259), which are absent in RAC-2 as Ssz1-NBD has  
211 detached from Zuo1-ZHD and moved away from the tunnel exit by 10 Å.

212        While at C2 the contact with ES12 stays invariant in both RAC conformations and  
213 throughout ribosomal rotation, the tip of ES12 adapts by a 15° bend in a movement  
214 independent from 40S body rotation (**Fig. 3c**). The tip of ES12 thus moves by 15 Å.  
215 Interestingly, next to its flexible tip, ES12 is held in place by another ribosome-internal  
216 ARM, this time provided by eL24 of the 60S subunit that is threaded through a widened

217 ES12 major groove and with its long C-terminal helix anchors on the 40S body  
218 (**Extended Data Fig. 8**). Furthermore, ES12 forms the end of the long 18S rRNA helix  
219 H44 located in between the 40S and 60S subunits (200 Å length) that reaches up to  
220 the codon-anticodon base pairs, and contacts Stm1 that occupies the P-site as  
221 described recently<sup>26</sup>. H44 is known to ensure the accuracy of translation elongation  
222 and termination<sup>22</sup>, however further investigation is needed to delineate the exact role  
223 of RAC in translational fidelity . Overall, we observe RAC in two distinct conformations  
224 on a rotating ribosome and resolve mechanistic details of RAC-80S interactions.

225

### 226 **Model of Ssb stimulation by Zuo1**

227 RAC forms a functional chaperone triad with Ssb, which needs activation by Zuo1-J  
228 for productive interaction with nascent chains. Our structures of RAC at the 80S, and  
229 structures of the *E. coli* DnaK/DnaJ complex<sup>29</sup> and of yeast Ssb (open, ATP-bound  
230 state)<sup>34</sup> allow us to derive a structure-based model of the RAC/Ssb triad at the  
231 ribosome. First, the DnaJ J-domain is superposed on Zuo1-J (RAC-2 chosen, RAC-1  
232 also possible), and second, DnaK (in the DnaK/J complex) is replaced by Ssb<sup>34</sup> to  
233 obtain a model for Ssb activation by the Zuo1 HPD-motif (**Extended Data Fig. 9**). In  
234 the superposition of the J-domains, the NBDs of DnaK and Ssz1 would clash. The  
235 Ssz1-NBD that masks the Zuo1 HPD-motif (described above) needs to detach from  
236 the Zuo1 J-ZHD unit, which is anchored at the ribosomal tunnel exit by C1.  
237 Noteworthy, in RAC-2 the slight detachment of Ssz1-NBD from Zuo1-ZHD (moved  
238 away from the tunnel exit by 10 Å compared with RAC-1) already opens this weak  
239 contact and provides access to the tunnel exit. The short Zuo1 N-J linker (13 residues)  
240 will keep Ssz1-Zuo1N in close neighborhood. Superimposing Ssb on DnaK places  
241 Ssb-SBDβ directly on top of the tunnel exit ready for interaction with short nascent

242 chains consistent with previous cross-link and ribosome profiling data (**Extended Data**  
243 **Fig. 9c**)<sup>3,17</sup>. In the ATP-bound open state, the Ssb-SBD $\alpha$  lid domain is not interfering  
244 with any contacts and points away from the ribosome. This seems counterintuitive as  
245 the lid domain harbors the key ribosome binding motif of Ssb. However, the structures  
246 of Ssb-ATP and DnaK-ATP have been obtained by fixing the domain arrangement by  
247 an engineered disulfide bridge<sup>34,35</sup>. In addition, autonomous ribosome binding of Ssb  
248 is not required for its function in presence of RAC<sup>36</sup>.

249 In contrast to most Hsp70 chaperones that can be activated by several JDPs,  
250 it has been shown that Zuo1 is the only JDP that activates Ssb and stimulates ATP  
251 hydrolysis<sup>5</sup>. However, the basis of this specificity was not clear. Our model with Ssb  
252 in the activating position does not show any clashes with Zuo1 or the ribosome, and  
253 the Ssb-Zuo1-J interface shows all characteristic interactions described for the DnaK-  
254 DnaJ complex<sup>29</sup> (**Extended Data Fig. 10**). In addition to these canonical Hsp70/JDP  
255 interactions, our model also visualizes Ssb-specific interactions with Zuo1.  
256 Interestingly, these specific interactions mainly involve a KRR-motif (residues 429-431  
257 in ScSsb; KKR-motif in CtSsb) in Ssb-SBD $\beta$  that has previously been described as a  
258 ribosome attachment point<sup>24,36</sup>. In our model however, the two lysines embrace Zuo1-  
259 J Trp98, while the arginine forms a salt bridge with Zuo1-ZHD Asp248 (**Extended**  
260 **Data Fig. 10c**) that replaces the interaction with Ssz1-NBD observed in RAC-1 (but  
261 not in RAC-2). Therefore, our structure-based model suggests that the KRR-motif  
262 contributes to the specific activation of Ssb by Zuo1.

263

## 264 **Discussion**

265 The RAC-80S structures described here provide the details of RAC architecture and  
266 the RAC/80S interaction. The contacts observed between 80S ribosomes and RAC

267 localize this specific Hsp40/Hsp70 activity at the ribosomal tunnel exit and provide an  
268 answer to the function of Ssz1 and the specificity of the Zuo1/Ssb pair. Together with  
269 previously obtained crystal structures of JDP/Hsp70 complexes<sup>29,37</sup> and Ssb<sup>34</sup>, the  
270 RAC-80S structures allow us to extend on our RAC/Ssb model and propose a  
271 mechanism for the action of the RAC-Ssb chaperone triad on the ribosome (**Fig. 4**).  
272 The mechanism is based on our observation that the strong ARM contacts of Zuo1  
273 stay invariant during ribosomal rotation and that the ZHD/J-domain entity behaves as  
274 rigid body. Thus, it can be assumed that RAC remains attached to the RNC during  
275 protein biosynthesis and the J-domain position adapts to the observed RAC-  
276 conformations. The second premise is that the activating JDP/Hsp70 interaction,  
277 mediated by the HPD-motif, is universally conserved and that the available crystal  
278 structures can serve as general template. While in non-activating case of Zuo1/Ssz1,  
279 the HPD-motif is completely masked by its Ssz1-NBD interaction. Furthermore,  
280 nascent chain (NC) binding contributes to RAC/Ssb interaction at the ribosome, and  
281 specific sequence requirements for Ssb/NC interaction were determined by ribosome  
282 profiling<sup>17</sup>. Ssb binds to degenerated sequence motifs enriched in positively charged  
283 and hydrophobic residues positioned at a distance of 35-53 residues from the PTC<sup>17</sup>,  
284 and cross-linking data indicate that the NC is handed over in a relay from Zuo1 via  
285 Ssz1 to Ssb<sup>8</sup>. In the absence of functional RAC, Ssb fails to interact with NCs as the  
286 high-affinity substrate binding state of Ssb is not induced<sup>15,34</sup>. Our structures now  
287 localize the Zuo1-ZHD next to the tunnel exit and show that it not only modulates  
288 ribosome and Ssz1 interactions, but also exposes a highly negatively charged surface  
289 in a matching distance from the PTC. The adjacent Ssz1-NBD IIB lobe is also  
290 negatively charged (and slightly hydrophobic) while the more distal interface to the IA  
291 lobe is strongly positively charged. Our current model integrates these observations,

292 and suggests that complementary charges might contribute to NC binding and  
293 handover. Positively charged NCs first interact with Zuo1-ZHD, while slightly longer  
294 NCs, can bind to adjacent negative and slightly hydrophobic patches in Ssz1-NBD  
295 lobe IIB (**Extended Data Fig. 10a**). Further elongation of the NC and the dynamic  
296 Zuo1-ZHD/Ssz1-NBD contact, as observed between the RAC-1 and RAC-2  
297 complexes, can then direct the NC towards the positive patch in between Ssz1-NBD  
298 lobes IB and IIB, and are probably sufficient to dissociate the weak contact between  
299 Ssz1-NBD and the Zuo1 HPD-motif. This would allow Ssb to join in and engage in the  
300 canonical activating, transient J-domain contact (**Extended Data Fig. 10b**). Activation  
301 of ATP-hydrolysis in Ssb drives efficient NC interaction (Ssb in the ADP state) when  
302 dislodging from the ribosomal surface. The J-domain can then again be masked by  
303 Ssz1 to avoid unproductive engagements e.g., with another Ssb molecule.

304 The position of Ssb at the ribosome has remained quite puzzling despite  
305 several cross-link studies<sup>3,5,19-24</sup>. Recent data place Ssb next to the tunnel exit with  
306 different binding modes (with bound ATP or ADP)<sup>24</sup>. Furthermore, these data specify  
307 interactions between Ssz1-NBD with both Ssb-NBD and -SBD $\alpha$ , and suggest the  
308 formation of an Ssz1-Ssb NBD heterodimer. Such placement of Ssb nicely correlates  
309 with our cryo-EM structures and supports our structure-based model (**Fig. 4** and  
310 **Extended Data Fig. 10c**). Notably, the proposed heterodimer interaction resembles  
311 homodimers observed in crystals of the Hsp70s Ssb<sup>34</sup> and DnaK<sup>38</sup>, and also the  
312 Hsp110 Sse1<sup>39</sup>, suggesting that NBD dimer formation might be more common in  
313 Hsp70 and Hsp110 chaperones.

314 The two distinct RAC conformations observed in this study do not correlate with  
315 ribosomal rotation. Therefore, the question remains to what triggers RAC-1/RAC-2  
316 oscillation, and how the entire chaperone triad is coupled to translation on one hand

317 and to Ssb ATP-binding and hydrolysis on the other hand. It is tempting to speculate  
318 that factors missing in our study might be involved, e.g., the complete mRNA•tRNA<sub>2</sub>  
319 module and a steadily growing NC that harbors Ssb-substrate sequences. ES12  
320 dynamics is likely to play an essential role with ES12 also being important for fidelity  
321 of translation<sup>22,40</sup>. Different studies already investigated the 4HB interaction with  
322 ES12<sup>22,40</sup>, however, so far only with perturbed or truncated systems. While it was  
323 previously envisaged that a direct coupling between RAC binding and the ribosome  
324 active center occurs via the central rRNA helix H44 including ES12 at its tip<sup>23</sup>, our  
325 structures suggest the RAC influence on fidelity to depend on its constant binding  
326 probably by modulating the speed of ratcheting. Further functional and especially high-  
327 resolution structural studies of all components of stalled on-pathway complexes are  
328 needed to finally unveil the complete movie of this unique co-translational chaperone  
329 triad in protein biosynthesis. The absence of a Ssz1 homolog in humans and the  
330 presence of additional domains in *hsZuo1* together with off-ribosomal transcriptional  
331 functions of Zuo1 and Ssz1<sup>23,41</sup> promise further surprises from this puzzling Hsp70  
332 chaperone system.

333

334 **Data availability.** EM maps have been deposited in the Electron Microscopy Data  
335 Bank under accession codes EMDB: EMD-14479 for RAC conformation 1 and EMDB:  
336 EMD-14480 for RAC conformation 2. The atomic models have been deposited in the  
337 Protein Data Bank under accession numbers PDB: 7Z3N and PDB: 7Z3O.

338

339 **Acknowledgements.** We thank S. Adrian for growing *C. thermophilum* cultures, A.  
340 Hendricks for technical support, and S. Pfeffer and members of the Sinning lab for  
341 stimulating discussions. Initial cryo-EM data were collected at the ESRF CM01 with

342 support of Dr. Daouda A. K. Traore. Cryo-EM data used for 80S-RAC structure  
343 determination were collected at the University of Heidelberg (HDcryoNet) with support  
344 from D. Flemming and G. Hofhaus. We acknowledge the data storage service  
345 SDS@hd and bwHPC supported by the Ministry of Science, Research and the Arts  
346 Baden Württemberg (MWK) and the Deutsche Forschungsgemeinschaft (DFG)  
347 through grants INST 35/1314-1 FUGG and INST 35/1134-1 FUGG. This work was  
348 supported by the DFG through the Leibniz Programme (SI 586/6-1) to I.S.

349

350 **Author contributions.** N.K. and E.H. provided the materials and the protocols for  
351 native complex pull-outs from *Chaetomium thermophilum*. K.L. cloned, expressed and  
352 purified pull-out Ct80S-RAC. M.K. purified Ct80S ribosomes. G.V.G. optimized sample  
353 for cryo-EM preparation. M.K. prepared cryo-EM samples, collected and processed  
354 EM data. M.K. and K.W. built the structural models. M.K., K.W., and I.S. interpreted  
355 the data. M.K., K.W., and I.S. wrote the manuscript with contributions from all authors.  
356 M.K., K.L., K.W., and I.S. planned the study and designed the experiments.

357

358 **Competing interests.** The authors declare no competing interests.

359

360 **Materials & Correspondence.** Requests should be addressed to  
361 irmi.sinning@bzh.uni-heidelberg.de.

## 362 REFERENCES

- 363 1. Kramer, G., Shiber, A. & Bukau, B. Mechanisms of Cotranslational Maturation of  
364 Newly Synthesized Proteins. *Annu Rev Biochem* **88**, 337-364 (2019).
- 365 2. Balchin, D., Hayer-Hartl, M. & Hartl, F.U. In vivo aspects of protein folding and quality  
366 control. *Science* **353**, aac4354 (2016).
- 367 3. Zhang, Y., Sinning, I. & Rospert, S. Two chaperones locked in an embrace: structure  
368 and function of the ribosome-associated complex RAC. *Nat Struct Mol Biol* **24**, 611-  
369 619 (2017).
- 370 4. Gautschi, M. et al. RAC, a stable ribosome-associated complex in yeast formed by the  
371 DnaK-DnaJ homologs Ssz1p and zuotin. *Proc Natl Acad Sci U S A* **98**, 3762-7 (2001).
- 372 5. Huang, P., Gautschi, M., Walter, W., Rospert, S. & Craig, E.A. The Hsp70 Ssz1  
373 modulates the function of the ribosome-associated J-protein Zuo1. *Nat Struct Mol*  
374 *Biol* **12**, 497-504 (2005).
- 375 6. Weyer, F.A., Gumiero, A., Gese, G.V., Lapouge, K. & Sinning, I. Structural insights into  
376 a unique Hsp70-Hsp40 interaction in the eukaryotic ribosome-associated complex.  
377 *Nat Struct Mol Biol* **24**, 144-151 (2017).
- 378 7. Mayer, M.P. Hsp70 chaperone dynamics and molecular mechanism. *Trends Biochem*  
379 *Sci* **38**, 507-14 (2013).
- 380 8. Zhang, Y. et al. The ribosome-associated complex RAC serves in a relay that directs  
381 nascent chains to Ssb. *Nat Commun* **11**, 1504 (2020).
- 382 9. Yan, W. et al. Zuotin, a ribosome-associated DnaJ molecular chaperone. *EMBO J* **17**,  
383 4809-17 (1998).
- 384 10. Cyr, D.M., Langer, T. & Douglas, M.G. DnaJ-like proteins: molecular chaperones and  
385 specific regulators of Hsp70. *Trends Biochem Sci* **19**, 176-81 (1994).
- 386 11. Cheetham, M.E. & Caplan, A.J. Structure, function and evolution of DnaJ:  
387 conservation and adaptation of chaperone function. *Cell Stress Chaperones* **3**, 28-36  
388 (1998).
- 389 12. Craig, E.A. & Marszalek, J. How Do J-Proteins Get Hsp70 to Do So Many Different  
390 Things? *Trends Biochem Sci* **42**, 355-368 (2017).
- 391 13. Rosenzweig, R., Nillegoda, N.B., Mayer, M.P. & Bukau, B. The Hsp70 chaperone  
392 network. *Nat Rev Mol Cell Biol* **20**, 665-680 (2019).
- 393 14. Kampinga, H.H. & Craig, E.A. The HSP70 chaperone machinery: J proteins as drivers  
394 of functional specificity. *Nat Rev Mol Cell Biol* **11**, 579-92 (2010).
- 395 15. Gautschi, M., Mun, A., Ross, S. & Rospert, S. A functional chaperone triad on the  
396 yeast ribosome. *Proc Natl Acad Sci U S A* **99**, 4209-14 (2002).
- 397 16. Hundley, H. et al. The in vivo function of the ribosome-associated Hsp70, Ssz1, does  
398 not require its putative peptide-binding domain. *Proc Natl Acad Sci U S A* **99**, 4203-8  
399 (2002).
- 400 17. Doring, K. et al. Profiling Ssb-Nascent Chain Interactions Reveals Principles of Hsp70-  
401 Assisted Folding. *Cell* **170**, 298-311 e20 (2017).
- 402 18. Willmund, F. et al. The cotranslational function of ribosome-associated Hsp70 in  
403 eukaryotic protein homeostasis. *Cell* **152**, 196-209 (2013).
- 404 19. Peisker, K. et al. Ribosome-associated complex binds to ribosomes in close proximity  
405 of Rpl31 at the exit of the polypeptide tunnel in yeast. *Mol Biol Cell* **19**, 5279-88  
406 (2008).



- 407 20. Leidig, C. et al. Structural characterization of a eukaryotic chaperone--the ribosome-  
408 associated complex. *Nat Struct Mol Biol* **20**, 23-8 (2013).
- 409 21. Zhang, Y. et al. Structural basis for interaction of a cotranslational chaperone with  
410 the eukaryotic ribosome. *Nat Struct Mol Biol* **21**, 1042-6 (2014).
- 411 22. Lee, K., Sharma, R., Shrestha, O.K., Bingman, C.A. & Craig, E.A. Dual interaction of the  
412 Hsp70 J-protein cochaperone Zuotin with the 40S and 60S ribosomal subunits. *Nat*  
413 *Struct Mol Biol* **23**, 1003-1010 (2016).
- 414 23. Shrestha, O.K. et al. Structure and evolution of the 4-helix bundle domain of Zuotin,  
415 a J-domain protein co-chaperone of Hsp70. *PLoS One* **14**, e0217098 (2019).
- 416 24. Lee, K. et al. Pathway of Hsp70 interactions at the ribosome. *Nat Commun* **12**, 5666  
417 (2021).
- 418 25. Kellner, N. et al. Developing genetic tools to exploit *Chaetomium thermophilum* for  
419 biochemical analyses of eukaryotic macromolecular assemblies. *Sci Rep* **6**, 20937  
420 (2016).
- 421 26. Kisonaite, M., Wild, K., Lapouge, K., Ruppert, T. & Sinning, I. High-resolution  
422 structures of a thermophilic eukaryotic 80S ribosome reveal atomistic details of  
423 translocation. *Nat Commun* **13**, 476 (2022).
- 424 27. Ducett, J.K. et al. Unfolding of the C-terminal domain of the J-protein Zuo1 releases  
425 autoinhibition and activates Pdr1-dependent transcription. *J Mol Biol* **425**, 19-31  
426 (2013).
- 427 28. Mayer, M.P. & Gierasch, L.M. Recent advances in the structural and mechanistic  
428 aspects of Hsp70 molecular chaperones. *J Biol Chem* **294**, 2085-2097 (2019).
- 429 29. Kityk, R., Kopp, J. & Mayer, M.P. Molecular Mechanism of J-Domain-Triggered ATP  
430 Hydrolysis by Hsp70 Chaperones. *Mol Cell* **69**, 227-237 e4 (2018).
- 431 30. Zhang, W., Dunkle, J.A. & Cate, J.H. Structures of the ribosome in intermediate states  
432 of ratcheting. *Science* **325**, 1014-7 (2009).
- 433 31. Punjani, A. & Fleet, D.J. 3D variability analysis: Resolving continuous flexibility and  
434 discrete heterogeneity from single particle cryo-EM. *J Struct Biol* **213**, 107702 (2021).
- 435 32. Grotwinkel, J.T., Wild, K., Segnitz, B. & Sinning, I. SRP RNA remodeling by SRP68  
436 explains its role in protein translocation. *Science* **344**, 101-4 (2014).
- 437 33. Kaschner, L.A., Sharma, R., Shrestha, O.K., Meyer, A.E. & Craig, E.A. A conserved  
438 domain important for association of eukaryotic J-protein co-chaperones Jjj1 and  
439 Zuo1 with the ribosome. *Biochim Biophys Acta* **1853**, 1035-45 (2015).
- 440 34. Gumiero, A. et al. Interaction of the cotranslational Hsp70 Ssb with ribosomal  
441 proteins and rRNA depends on its lid domain. *Nat Commun* **7**, 13563 (2016).
- 442 35. Kityk, R., Kopp, J., Sinning, I. & Mayer, M.P. Structure and dynamics of the ATP-  
443 bound open conformation of Hsp70 chaperones. *Mol Cell* **48**, 863-74 (2012).
- 444 36. Hanebuth, M.A. et al. Multivalent contacts of the Hsp70 Ssb contribute to its  
445 architecture on ribosomes and nascent chain interaction. *Nat Commun* **7**, 13695  
446 (2016).
- 447 37. Jiang, J. et al. Structural basis of J cochaperone binding and regulation of Hsp70. *Mol*  
448 *Cell* **28**, 422-33 (2007).
- 449 38. Qi, R. et al. Allosteric opening of the polypeptide-binding site when an Hsp70 binds  
450 ATP. *Nat Struct Mol Biol* **20**, 900-7 (2013).
- 451 39. Liu, Q. & Hendrickson, W.A. Insights into Hsp70 chaperone activity from a crystal  
452 structure of the yeast Hsp110 Sse1. *Cell* **131**, 106-20 (2007).

- 453 40. Rakwalska, M. & Rospert, S. The ribosome-bound chaperones RAC and Ssb1/2p are  
454 required for accurate translation in *Saccharomyces cerevisiae*. *Mol Cell Biol* **24**, 9186-  
455 97 (2004).
- 456 41. Chernoff, Y.O. & Kiktev, D.A. Dual role of ribosome-associated chaperones in prion  
457 formation and propagation. *Curr Genet* **62**, 677-685 (2016).
- 458
- 459

460 **FIGURES**

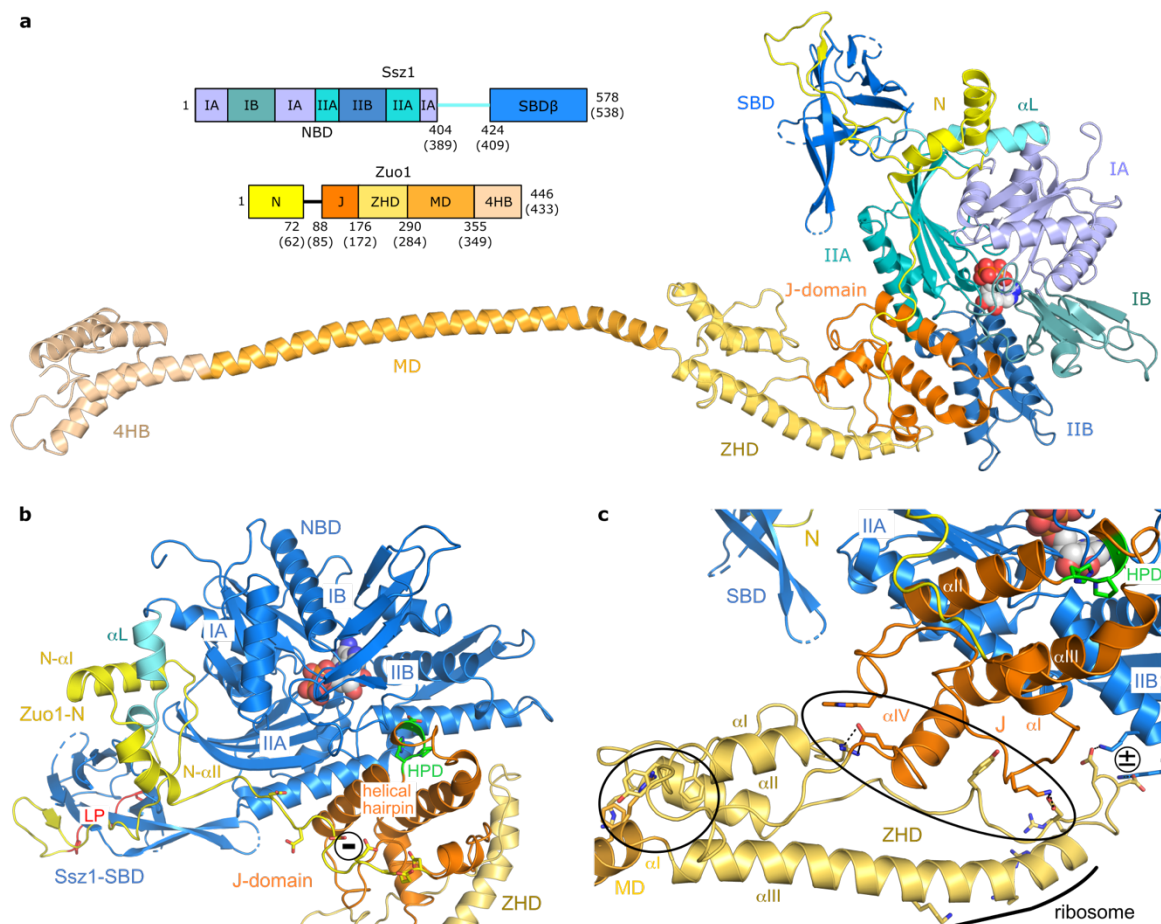

461  
462

463 **Fig. 1 | Architecture of full-length RAC reveals new contacts between Ssz1 and**  
464 **Zuo1.**

465 **a**, Cryo-EM structure of *Chaetomium thermophilum* RAC in ribbon representation and  
466 its domain architecture (residue numbers are given for *C. thermophilum*;  
467 corresponding residues in *S. cerevisiae* are in brackets). For purpose of  
468 representation, only RAC-1 conformation is shown. Ssz1 comprises a nucleotide  
469 binding domain (NBD; shades of blue), a linker ( $\alpha$ L; cyan), and a substrate binding  
470 domain  $\beta$  (SBD $\beta$ ; dark blue). NBD lobes IA, IIA, IB and IIB are shown in different  
471 shades of blue. Zuo1 comprises an N-terminal domain (N; yellow), J-domain (J;  
472 orange), Zuo1 homology domain (ZHD; pale yellow), middle domain (MD; pale

473 orange), and four-helix bundle (4HB; tan). Disordered residues are indicated as dotted  
474 lines. ATP is shown in sphere representation. **b**, The Ssz1-Zuo1N interface is enlarged  
475 by an extension of Zuo1N- $\alpha$ I and Zuo1N- $\alpha$ II. Zuo1-J shows the canonical J-domain  
476 fold with a central helical hairpin and contacts Ssz1-NBD. It bridges lobes IIA to IIB  
477 and contains the conserved HPD-motif (CtZuo1 His133-Pro134-Asp135; green). The  
478 HPD-motif breaks the first helix at its C-terminus and is completely masked by its  
479 Ssz1-NBD interaction. LP-motif binding to the Ssz1-SBD is highlighted in red. **c**, Zuo1-  
480 J and -ZHD are directly linked and form a rigid entity. The J-ZHD contact involves salt  
481 bridges and stacking aromates (large black ellipse). An additional small contact  
482 (present in RAC-1 conformation only) between Zuo1-ZHD and Ssz1-NBD involves two  
483 aspartates adjacent to ZHD- $\alpha$ III (annotated by +/-). The Zuo1 ZHD-MD contact is  
484 indicated by a small black circle.

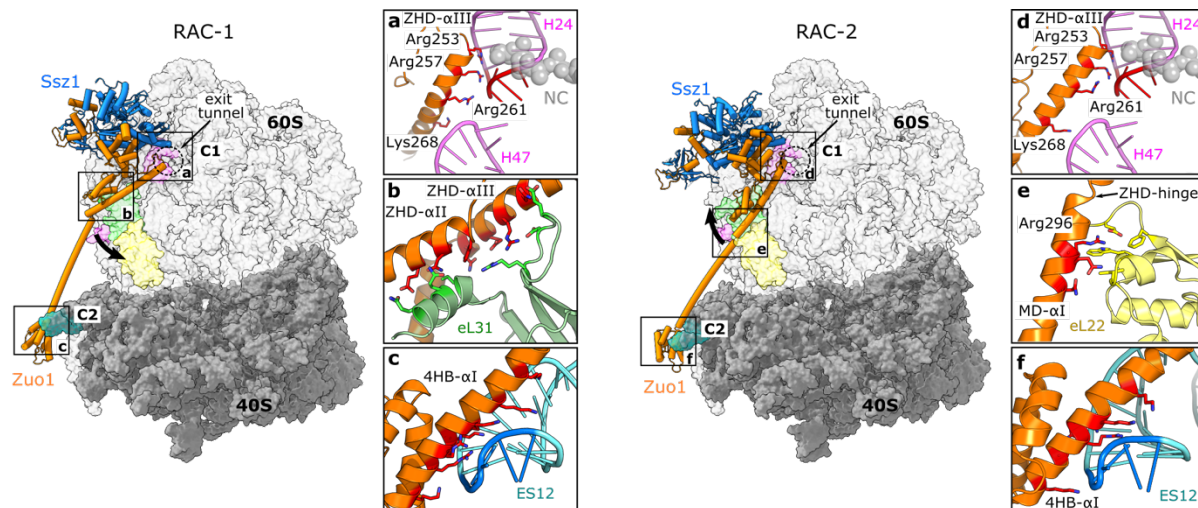

485

486

487 **Fig. 2 | RAC interactions with the 80S ribosome.** Cryo-EM structures of *Ct*RAC

488 bound to the 80S ribosome in two distinct conformations – RAC-1 (left) and RAC-2

489 (right). The main 80S contacts are highlighted with squares that correspond to the

490 zoom images **a** to **f**. **a, d**, ZHD-80S interaction (C1 contact) with H24 and H47 of the

491 26S rRNA in RAC-1 (**a**) and RAC-2 (**d**). C1 is formed by the N-terminal end of the lever

492 arm (ZHD- $\alpha$ III) at the rim of the ribosomal tunnel exit. **b**, ZHD interaction with the eL31

493 ribosomal protein in RAC-1. **e**, ZHD-MD interaction with the eL22 ribosomal protein in

494 RAC-2. **c, f**, 4HB interaction (C2 contact) with ES12 of the 18S rRNA in RAC-1 (**c**) and

495 RAC-2 (**f**). C2 is formed at the C-terminal end of the lever arm (Zuo1-4HB) and the

496 closing tetraloop (1695-GCAA) of ES12 in the 40S subunit.

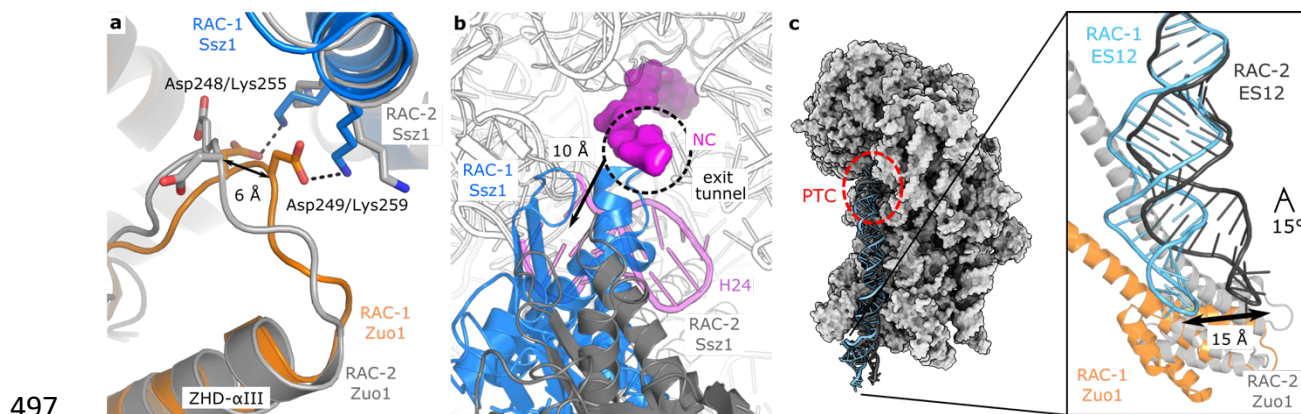

499 **Fig. 3 | Details of structural differences between RAC-1 and RAC-2.**

500 RAC-1 is shown in color (Ssz1 – blue, Zuo1 – orange), while RAC-2 is shown in grey.

501 **a** and **b**, Contact between Zuo1-ZHD and Ssz1-NBD close to the tunnel exit. In RAC-  
502 1, this contact comprises two salt-bridges (Zuo1-Asp248/Ssz1-Lys255,  
503 Asp249/Lys259), which are absent in RAC-2 (shift of 6 Å, **a**). The contact between

504 Zuo1 and Ssz1 is abolished as Ssz1-NBD has detached from Zuo1-ZHD and moved  
505 away from the tunnel exit by 10 Å (**b**). Nascent chain (NC) is shown in magenta and  
506 represented as surface. 26S rRNA H24 that is involved in the C1 contact is shown in

507 pink. **c**, The 40S-Zuo1 contact. 40S shown in surface representation (left; grey) with  
508 ES12 of the 18S rRNA shown in sticks, and the peptidyl transferase center (PTC)

509 highlighted by a red circle. Zoom in view (right) of the Zuo1-4HB interaction (C2  
510 contact) with ES12 in both RAC conformations. The 4HB-ES12 contact stays invariant,  
511 but the tip of ES12 adapts by a 15° bend and moves by 15 Å.

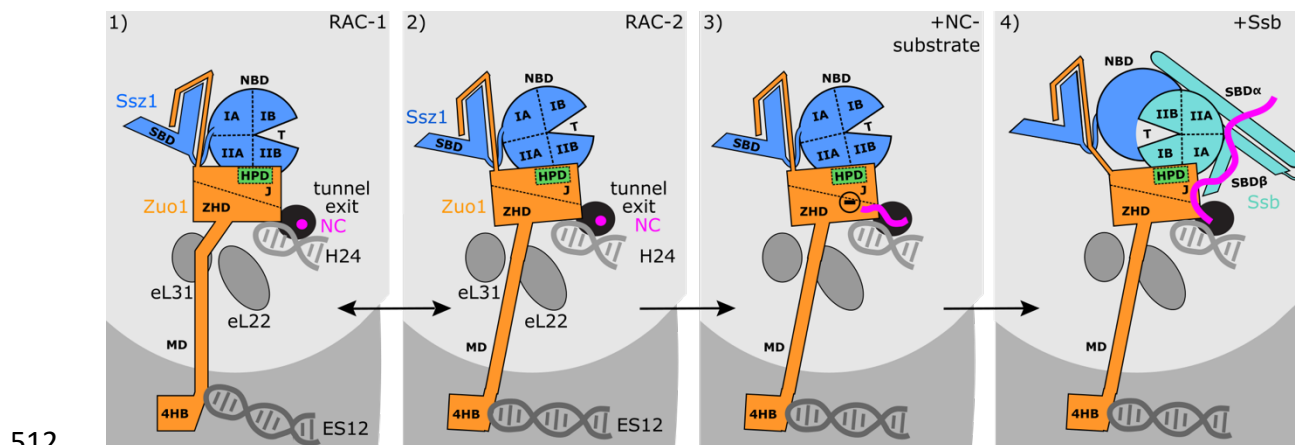

512

513

514 **Fig. 4 | Structure-based model for RAC/Ssb action at the 80S.** Integrating our cryo-

515 EM structures with the current data on RAC and Ssb allows to devise a detailed model

516 of RAC/Ssb action at the ribosome. RAC binds to the 80S in two distinct conformations

517 with Zuo1 oscillating between RAC-1 and RAC-2 (panels 1, 2). The HPD-motif of

518 Zuo1-J (green) is masked by Ssz1-NBD. A RAC/Ssb substrate (positively charged

519 NC) emerging from the exit tunnel first interacts with a negatively charged patch in

520 Zuo1 (panel 3). Elongation of the NC allows it to reach a positively charged patch in

521 Ssz1 (not indicated). The NC pushes the Ssz1-NBD away and thereby frees the HPD-

522 motif. This allows for Zuo1-Ssb interaction, the growing NC contacts Ssb, which can

523 now be stimulated by Zuo1-J (panel 4). Ssb is positioned next to the tunnel exit, with

524 its SBD conveniently placed close to the emerging NC and its NBD forming a

525 heterodimer with Ssz1-NBD. When the Ssz1-NBD is displaced from the HPD by NC

526 and Ssb binding, the Ssz1-SBD stays tied-up with Zuo1-N. After stimulation of ATP

527 hydrolysis Ssb can detach from the ribosome and Ssz1-NBD returns to shield the

528 HPD-motif.

## 529 **METHODS**

### 530 **Construct design, cloning and expression**

531 The pRSF-duet-ctSSZ-FTpA was used for ectopic integration and expression of SSZ-  
532 FTpA in *Chaetomium thermophilum*. SSZ promoter region (628 bases) and open  
533 reading frame were amplified by PCR from *Chaetomium thermophilum* genomic DNA  
534 and fused to the Flag-TEV-protA tag resulting into the pRSFduet-ctSSZ-FTpA  
535 plasmid. *Chaetomium thermophilum* wildtype strain was transformed with the  
536 pRSFduet-ctSSZ-FTpA plasmid as described<sup>25</sup>. In brief, protoplast were generated  
537 from the cell wall digestion of the fungus mycelium and mixed with the linearized  
538 plasmid DNA. The transformed protoplast were plated and selected on CCM-sorbitol  
539 agar plates, supplemented with 0.5mg/ml terbinafine, incubated at 50°C for three  
540 days. Expression of the SSZ-FTpA protein was verified by Western blotting of whole-  
541 cell lysate using PAP (Sigma-Aldrich, P1291) antibodies according to the  
542 manufacturer's protocol.

543 ctSSZ1-FTpA mycelia were cultivated in a rotary shaker at 90 r.p.m. at 55 °C,  
544 harvested through a metal sieve, washed with water, dried with a vacuum filter and  
545 immediately frozen in liquid nitrogen. Frozen mycelium cells were ground to fine  
546 powder by Cryo Mill (Retch) (5 min, frequency 30/s) and stored at -80 °C.

547

### 548 **Purification of *C. thermophilum* 80S-RAC complexes**

549 The powdered mycelium was resuspended in 20 mM HEPES-KOH (pH 8.0), 150 mM  
550 NaCl, 50 mM KOAc, 2 mM Mg(OAc)<sub>2</sub>, 1 mM DTT, 5% glycerol and 0.1% NP-40.  
551 Insoluble material was removed by centrifugation (17,000 r.p.m., JA25-50 rotor  
552 (Beckman), 30 min). The lysate was transferred onto IgG beads and incubated at 4  
553 °C, for 15 hours. Beads were washed (20 mM HEPES-KOH (pH 8.0), 150 mM NaCl,



554 50 mM KOAc, 2 mM Mg(OAc)<sub>2</sub>, 1 mM DTT, 5% glycerol, 0.01% NP-40), incubated  
555 with TEV protease at 4 °C, for 4 hours and eluted. The elution fractions were pooled  
556 together and precipitated by adding 7% w/v of PEG20000. After a 10 min  
557 centrifugation, the pellets were resuspended in 20 mM HEPES-KOH (pH 7.5), 50 mM  
558 KOAc, 5 mM Mg(OAc)<sub>2</sub>, 2 mM DTT and used for cryo-EM grid preparation or stored  
559 at -80 °C.

560

### 561 **Purification of *C. thermophilum* 80S ribosomes**

562 The protocol for the isolation of Cf80S ribosomes was as previously described<sup>26</sup>. In  
563 brief, the powdered mycelium was resuspended in 20 mM HEPES-KOH (pH 7.5), 500  
564 mM KOAc, 5 mM Mg(OAc)<sub>2</sub>, 2 mM DTT and 0.5 mM PMSF and vortexed until no  
565 clumps remained. Insoluble material was removed by centrifugation (20,000 r.p.m.,  
566 JA25-50 rotor (Beckman), 35 min). Ribosomes were pelleted through a high-salt  
567 sucrose cushion (20 mM HEPES-KOH (pH 7.5), 500 mM KOAc, 1.5 M sucrose, 5 mM  
568 Mg(OAc)<sub>2</sub> and 2 mM DTT) at 35,000 r.p.m. in a Ti-865 rotor (Thermo Scientific) for 18  
569 h before they were resuspended in 20 mM HEPES-KOH (pH 7.5), 50 mM KOAc, 5  
570 mM Mg(OAc)<sub>2</sub>, 2 mM DTT and 0.5 mM PMSF. The Cf80S ribosomes were then  
571 incubated with 1 mM neutralized puromycin solution and 1 mM GTP for 1 hour at 30  
572 °C. The solution containing ribosomes were further purified in 15–40% sucrose  
573 gradient (20 mM HEPES-KOH (pH 7.5), 150 mM KOAc, 5 mM Mg(OAc)<sub>2</sub>, 15–40%  
574 sucrose, 2 mM DTT and 0.5 mM PMSF) at 18,000 r.p.m. in a Superspin 630 rotor  
575 (Sorvall) for 15 h. Peak fractions containing Cf80S were pooled together and  
576 precipitated by adding 7% w/v of PEG20000. After a 10 min centrifugation, the pellets  
577 were resuspended in 20 mM HEPES-KOH (pH 7.5), 50 mM KOAc, 5 mM Mg(OAc)<sub>2</sub>,  
578 2 mM DTT and 0.5 mM PMSF, and stored at -80 °C.

579

## 580 **Cryo-electron microscopy grid preparation and data collection**

581 Three microliters of *Ct80S-RAC* pull-out sample at 200 nM concentration was applied  
582 on holey carbon grids (Quantifoil R2/1 grid, Quantifoil Micro Tools, GmbH) and  
583 plunged-frozen into liquid ethane using a Vitrobot (FEI). The Vitrobot environment  
584 chamber was programmed to maintain a temperature of 4 °C and 90% humidity. Initial  
585 cryo-EM data were collected at the ESRF CM01 and was used for sample optimization  
586 and grid improvement. Cryo-EM data used for the determination of the structures of  
587 *Ct80S-RAC* were collected on an in-house Titan Krios (FEI) operating at 300 kV. Data  
588 were collected on a Quantum-K3 detector using counting mode. The images were  
589 acquired at a nominal magnification of x81,000, with a total dose of 20.6 e<sup>-</sup>/Å<sup>2</sup>. Defocus  
590 range was set from -0.8 to -2.5 and every movie was fractioned into 149 frames.

591

## 592 **Single particle analysis and model building**

593 A total of 6,662 micrographs were used for the *Ct80S-RAC* structure determination.  
594 The frames were aligned and summed using MotionCor2 whole-image motion  
595 correction software<sup>42</sup>. CTFFIND4 was used for contrast transfer function (CTF)  
596 estimation of unweighted micrographs<sup>43</sup>. Particle auto-picking was performed with  
597 Relion 3.1<sup>44</sup> (Laplacian-of-Gaussian detection) and inspected manually where majority  
598 miss-picked particles or contaminants were removed. Later, particles were extracted  
599 (480x480 pixels), down-sampled (120x120 pixels) and subjected to two rounds of  
600 reference-free 2D classification in Relion 3.1. First cycle of 2D classification was  
601 performed with large search range (20 pixels) to achieve the best possible centering  
602 of the particles. The second round was performed in higher precision on 2 times down-  
603 sampled particles (240x240 pixels) with smaller search ranges (5 pixels). Only

604 properly centered class averages were selected for subsequent processing steps.  
605 Further processing was performed with cisTEM<sup>45</sup>. The stack of 837,930 particles from  
606 2D classification was imported to cisTEM and auto-refined using a yeast 80S ribosome  
607 as a reference (low pass filtered to 30 Å). Auto-refined particles were subjected to 3D  
608 classification, which resulted in removal of 19% of particles that did not contain RAC.  
609 Remaining particles were subjected to additional rounds of 3D focus classification  
610 (focusing on RAC or 40S subunit). The final resolution was measured by FSC at 0.143  
611 value as implemented in cisTEM. The local resolution variations were calculated with  
612 ResMap<sup>46</sup>. The 80S ribosome model was refined from the *Ct*80S structure (PDB ID:  
613 7OLC)<sup>26</sup>. As starting models for *Ct*RAC building we used the crystal structures of Ssz1  
614 (PDB ID: 6SR6)<sup>8</sup> and the components of Zuo1 (PDB IDs: 6SR6<sup>8</sup>, 5DJE<sup>22</sup>, 4GMQ<sup>20</sup>,  
615 2LWX<sup>27</sup>). The models were manually built and corrected in Coot<sup>47</sup>, and the real-space  
616 refinement was used in Phenix<sup>48</sup>. Atomic models were validated using Phenix and  
617 MolProbity<sup>49</sup>.

618

### 619 **Figure preparation**

620 Figures were prepared in GraphPad Prism, Pymol, UCSF Chimera<sup>50</sup> and UCSF  
621 ChimeraX<sup>51</sup>.

622

## 623 REFERENCES

- 624
- 625 42. Zheng, S.Q. et al. MotionCor2: anisotropic correction of beam-induced motion for  
626 improved cryo-electron microscopy. *Nat Methods* **14**, 331-332 (2017).
- 627 43. Rohou, A. & Grigorieff, N. CTFIND4: Fast and accurate defocus estimation from  
628 electron micrographs. *J Struct Biol* **192**, 216-21 (2015).
- 629 44. Scheres, S.H. RELION: implementation of a Bayesian approach to cryo-EM structure  
630 determination. *J Struct Biol* **180**, 519-30 (2012).
- 631 45. Grant, T., Rohou, A. & Grigorieff, N. cisTEM, user-friendly software for single-particle  
632 image processing. *Elife* **7**(2018).
- 633 46. Kucukelbir, A., Sigworth, F.J. & Tagare, H.D. Quantifying the local resolution of cryo-  
634 EM density maps. *Nat Methods* **11**, 63-5 (2014).
- 635 47. Emsley, P., Lohkamp, B., Scott, W.G. & Cowtan, K. Features and development of  
636 Coot. *Acta Crystallogr D Biol Crystallogr* **66**, 486-501 (2010).
- 637 48. Adams, P.D. et al. PHENIX: a comprehensive Python-based system for  
638 macromolecular structure solution. *Acta Crystallogr D Biol Crystallogr* **66**, 213-21  
639 (2010).
- 640 49. Williams, C.J. et al. MolProbity: More and better reference data for improved all-  
641 atom structure validation. *Protein Sci* **27**, 293-315 (2018).
- 642 50. Pettersen, E.F. et al. UCSF Chimera--a visualization system for exploratory research  
643 and analysis. *J Comput Chem* **25**, 1605-12 (2004).
- 644 51. Pettersen, E.F. et al. UCSF ChimeraX: Structure visualization for researchers,  
645 educators, and developers. *Protein Sci* **30**, 70-82 (2021).
- 646
